# Supplementary material
Source: MDPI journal article supplement (https://www.mdpi.com/search?q=molbank-2021-M1278)
Supplement: s002 [file molbank-2021-M1278-s002-mod.mol]

untitled.mol
  corina  09102113133D 1   1.00000     0.00000 
CORINA 4.3.0 0026  30.10.2019
  0  0  0     0  0              0 V3000
M  V30 BEGIN CTAB
M  V30 COUNTS 66 75 0 0 0
M  V30 BEGIN ATOM
M  V30 1 N  5.042013 4.912225 -3.955549 0
M  V30 2 C  4.988413 6.239246 -3.817296 0
M  V30 3 C  3.796399 6.828876 -3.382967 0
M  V30 4 C  2.704249 5.996340 -3.115953 0
M  V30 5 N  2.837855 4.678450 -3.284025 0
M  V30 6 C  3.983915 4.158479 -3.697134 0
M  V30 7 C  6.168084 7.069059 -4.111817 0
M  V30 8 C  1.426384 6.564929 -2.656909 0
M  V30 9 C  0.382824 5.755685 -2.403556 0
M  V30 10 C  7.308853 6.492049 -4.528693 0
M  V30 11 C  8.488422 7.321791 -4.823188 0
M  V30 12 C  -0.894930 6.324225 -1.944552 0
M  V30 13 C  9.675772 6.722280 -5.256985 0
M  V30 14 C  10.773436 7.496772 -5.531308 0
M  V30 15 C  10.706784 8.882537 -5.378019 0
M  V30 16 C  9.523161 9.482307 -4.944892 0
M  V30 17 C  8.421805 8.711414 -4.675189 0
M  V30 18 C  -1.981249 5.482981 -1.680707 0
M  V30 19 C  -3.170602 6.014257 -1.252759 0
M  V30 20 C  -3.297971 7.393503 -1.080297 0
M  V30 21 C  -2.215370 8.234329 -1.343492 0
M  V30 22 C  -1.022781 7.705958 -1.766052 0
M  V30 23 C  11.894081 9.717870 -5.674971 0
M  V30 24 C  -4.584111 7.965796 -0.617737 0
M  V30 25 C  11.829569 11.103094 -5.522412 0
M  V30 26 C  12.935013 11.877874 -5.799224 0
M  V30 27 C  14.114166 11.280004 -6.230800 0
M  V30 28 C  14.180882 9.899315 -6.383627 0
M  V30 29 C  13.079920 9.119838 -6.102078 0
M  V30 30 C  -4.713513 9.344056 -0.444725 0
M  V30 31 C  -5.910571 9.873963 -0.014417 0
M  V30 32 C  -6.989033 9.035941 0.247782 0
M  V30 33 C  -6.862435 7.661682 0.076043 0
M  V30 34 C  -5.669244 7.127730 -0.360033 0
M  V30 35 N  15.232694 12.067249 -6.511550 0
M  V30 36 N  -8.200703 9.575140 0.684589 0
M  V30 37 C  4.087270 2.688705 -3.869568 0
M  V30 38 C  5.282323 2.117708 -4.303073 0
M  V30 39 C  5.372941 0.749682 -4.461315 0
M  V30 40 C  4.280573 -0.054399 -4.190069 0
M  V30 41 C  3.090195 0.507453 -3.764968 0
M  V30 42 C  2.989811 1.873803 -3.598212 0
M  V30 43 C  16.342779 12.032563 -5.662543 0
M  V30 44 C  15.242463 12.890114 -7.641641 0
M  V30 45 C  -9.308904 9.585214 -0.167523 0
M  V30 46 C  -8.305610 10.104904 1.974027 0
M  V30 47 C  16.270858 12.604999 -4.398677 0
M  V30 48 C  17.369175 12.568517 -3.562398 0
M  V30 49 C  18.539583 11.962673 -3.981518 0
M  V30 50 C  18.614653 11.391878 -5.238946 0
M  V30 51 C  17.518610 11.420523 -6.078526 0
M  V30 52 C  16.303172 13.760399 -7.860074 0
M  V30 53 C  16.309830 14.571492 -8.977694 0
M  V30 54 C  15.262482 14.517847 -9.879220 0
M  V30 55 C  14.205044 13.652716 -9.664886 0
M  V30 56 C  14.194271 12.835346 -8.551864 0
M  V30 57 C  -9.472461 10.746454 2.370369 0
M  V30 58 C  -9.572865 11.268194 3.645005 0
M  V30 59 C  -8.513783 11.152262 4.526748 0
M  V30 60 C  -7.350816 10.514277 4.135532 0
M  V30 61 C  -7.245398 9.985995 2.863985 0
M  V30 62 C  -9.336823 10.438746 -1.263387 0
M  V30 63 C  -10.432916 10.445767 -2.103341 0
M  V30 64 C  -11.501819 9.604151 -1.854959 0
M  V30 65 C  -11.477348 8.753255 -0.765031 0
M  V30 66 C  -10.382373 8.737609 0.076284 0
M  V30 END ATOM
M  V30 BEGIN BOND
M  V30 1 2 1 2
M  V30 6 1 6 1
M  V30 2 1 2 3
M  V30 7 1 2 7
M  V30 3 2 3 4
M  V30 4 1 4 5
M  V30 8 1 4 8
M  V30 5 2 5 6
M  V30 41 1 6 37
M  V30 10 2 7 10
M  V30 9 2 8 9
M  V30 12 1 9 12
M  V30 11 1 10 11
M  V30 13 2 11 13
M  V30 18 1 17 11
M  V30 19 2 12 18
M  V30 24 1 22 12
M  V30 14 1 13 14
M  V30 15 2 14 15
M  V30 16 1 15 16
M  V30 25 1 15 23
M  V30 17 2 16 17
M  V30 20 1 18 19
M  V30 21 2 19 20
M  V30 22 1 20 21
M  V30 26 1 20 24
M  V30 23 2 21 22
M  V30 27 2 23 25
M  V30 32 1 29 23
M  V30 33 2 24 30
M  V30 38 1 34 24
M  V30 28 1 25 26
M  V30 29 2 26 27
M  V30 30 1 27 28
M  V30 39 1 27 35
M  V30 31 2 28 29
M  V30 34 1 30 31
M  V30 35 2 31 32
M  V30 36 1 32 33
M  V30 40 1 32 36
M  V30 37 2 33 34
M  V30 48 1 35 43
M  V30 49 1 35 44
M  V30 50 1 36 45
M  V30 51 1 36 46
M  V30 42 2 37 38
M  V30 47 1 42 37
M  V30 43 1 38 39
M  V30 44 2 39 40
M  V30 45 1 40 41
M  V30 46 2 41 42
M  V30 52 2 43 47
M  V30 57 1 51 43
M  V30 58 2 44 52
M  V30 63 1 56 44
M  V30 70 2 45 62
M  V30 75 1 66 45
M  V30 64 2 46 57
M  V30 69 1 61 46
M  V30 53 1 47 48
M  V30 54 2 48 49
M  V30 55 1 49 50
M  V30 56 2 50 51
M  V30 59 1 52 53
M  V30 60 2 53 54
M  V30 61 1 54 55
M  V30 62 2 55 56
M  V30 65 1 57 58
M  V30 66 2 58 59
M  V30 67 1 59 60
M  V30 68 2 60 61
M  V30 71 1 62 63
M  V30 72 2 63 64
M  V30 73 1 64 65
M  V30 74 2 65 66
M  V30 END BOND
M  V30 END CTAB
M  END
$$$$
