# Supplementary material
Source: MDPI journal article supplement (https://www.mdpi.com/search?q=molbank-2021-M1278)
Supplement: s002 [file molbank-2021-M1278-s002.inchi]

InChI=1S/C62H46N4/c1-6-16-53(17-7-1)62-63-54(40-30-47-26-32-49(33-27-47)51-36-42-60(43-37-51)65(56-18-8-2-9-19-56)57-20-10-3-11-21-57)46-55(64-62)41-31-48-28-34-50(35-29-48)52-38-44-61(45-39-52)66(58-22-12-4-13-23-58)59-24-14-5-15-25-59/h1-46H/b40-30+,41-31+
AuxInfo=1/0/N:40,49,54,59,64,39,41,48,50,53,55,58,60,63,65,38,42,47,51,52,56,57,61,62,66,13,17,18,22,10,9,14,16,19,21,25,29,30,34,7,8,26,28,31,33,3,11,12,15,20,23,24,37,2,4,43,44,46,45,27,32,6,1,5,35,36/E:(2,3,4,5)(6,7)(8,9,10,11,12,13,14,15)(16,17)(18,19,20,21,22,23,24,25)(26,27,28,29)(30,31)(32,33,34,35)(36,37,38,39)(40,41)(42,43,44,45)(47,48)(49,50)(51,52)(54,55)(56,57,58,59)(60,61)(63,64)(65,66)/rA:66NCCCNCCCCCCCCCCCCCCCCCCCCCCCCCCCCCNNCCCCCCCCCCCCCCCCCCCCCCCCCCCCCC/rB:d1;s2;d3;s4;s1d5;s2;s4;d8;d7;s10;s9;d11;s13;d14;s15;s11d16;d12;s18;d19;s20;s12d21;s15;s20;d23;s25;d26;s27;s23d28;d24;s30;d31;s32;s24d33;s27;s32;s6;d37;s38;d39;s40;s37d41;s35;s35;s36;s36;d43;s47;d48;s49;s43d50;d44;s52;d53;s54;s44d55;d46;s57;d58;s59;s46d60;d45;s62;d63;s64;s45d65;/rC:-1.3337,3.08,0;-1.3337,1.54,0;0,.77,0;1.3337,1.54,0;1.3337,3.08,0;0,3.85,0;-2.6674,.77,0;2.6674,.77,0;4.001,1.54,0;-4.001,1.54,0;-5.3347,.77,0;5.3347,.77,0;-6.6684,1.54,0;-8.0021,.77,0;-8.0021,-.77,0;-6.6684,-1.54,0;-5.3347,-.77,0;5.3347,-.77,0;6.6684,-1.54,0;8.0021,-.77,0;8.0021,.77,0;6.6684,1.54,0;-9.3358,-1.54,0;9.3358,-1.54,0;-10.6694,-.77,0;-12.0031,-1.54,0;-12.0031,-3.08,0;-10.6694,-3.85,0;-9.3358,-3.08,0;9.3358,-3.08,0;10.6694,-3.85,0;12.0031,-3.08,0;12.0031,-1.54,0;10.6694,-.77,0;-13.3368,-3.85,0;13.3368,-3.85,0;0,5.39,0;1.3337,6.16,0;1.3337,7.7,0;0,8.47,0;-1.3337,7.7,0;-1.3337,6.16,0;-14.6705,-3.08,0;-13.3368,-5.39,0;14.6705,-3.08,0;13.3368,-5.39,0;-14.6705,-1.54,0;-16.0042,-.77,0;-17.3378,-1.54,0;-17.3378,-3.08,0;-16.0042,-3.85,0;-14.6705,-6.16,0;-14.6705,-7.7,0;-13.3368,-8.47,0;-12.0031,-7.7,0;-12.0031,-6.16,0;12.0031,-6.16,0;12.0031,-7.7,0;13.3368,-8.47,0;14.6705,-7.7,0;14.6705,-6.16,0;16.0042,-3.85,0;17.3378,-3.08,0;17.3378,-1.54,0;16.0042,-.77,0;14.6705,-1.54,0;
