# Supplementary material
Source: MDPI journal article supplement (https://www.mdpi.com/search?q=molbank-2021-M1278)
Supplement: s002 [file molbank-2021-M1278-s002.mol]

untitled.mol
  ChemDraw08272113422D

  0  0  0     0  0              0 V3000
M  V30 BEGIN CTAB
M  V30 COUNTS 66 75 0 0 0
M  V30 BEGIN ATOM
M  V30 1 N -0.714471 1.650000 0.000000 0
M  V30 2 C -0.714471 0.825000 0.000000 0
M  V30 3 C 0.000000 0.412500 0.000000 0
M  V30 4 C 0.714471 0.825000 0.000000 0
M  V30 5 N 0.714471 1.650000 0.000000 0
M  V30 6 C 0.000000 2.062500 0.000000 0
M  V30 7 C -1.428942 0.412500 0.000000 0
M  V30 8 C 1.428942 0.412500 0.000000 0
M  V30 9 C 2.143413 0.825000 0.000000 0
M  V30 10 C -2.143413 0.825000 0.000000 0
M  V30 11 C -2.857884 0.412500 0.000000 0
M  V30 12 C 2.857884 0.412500 0.000000 0
M  V30 13 C -3.572355 0.825000 0.000000 0
M  V30 14 C -4.286826 0.412500 0.000000 0
M  V30 15 C -4.286826 -0.412500 0.000000 0
M  V30 16 C -3.572355 -0.825000 0.000000 0
M  V30 17 C -2.857884 -0.412500 0.000000 0
M  V30 18 C 2.857884 -0.412500 0.000000 0
M  V30 19 C 3.572355 -0.825000 0.000000 0
M  V30 20 C 4.286826 -0.412500 0.000000 0
M  V30 21 C 4.286826 0.412500 0.000000 0
M  V30 22 C 3.572355 0.825000 0.000000 0
M  V30 23 C -5.001297 -0.825000 0.000000 0
M  V30 24 C 5.001297 -0.825000 0.000000 0
M  V30 25 C -5.715768 -0.412500 0.000000 0
M  V30 26 C -6.430238 -0.825000 0.000000 0
M  V30 27 C -6.430238 -1.650000 0.000000 0
M  V30 28 C -5.715768 -2.062499 0.000000 0
M  V30 29 C -5.001297 -1.650000 0.000000 0
M  V30 30 C 5.001297 -1.650000 0.000000 0
M  V30 31 C 5.715768 -2.062500 0.000000 0
M  V30 32 C 6.430238 -1.650000 0.000000 0
M  V30 33 C 6.430238 -0.825000 0.000000 0
M  V30 34 C 5.715768 -0.412500 0.000000 0
M  V30 35 N -7.144709 -2.062500 0.000000 0
M  V30 36 N 7.144709 -2.062500 0.000000 0
M  V30 37 C 0.000000 2.887500 0.000000 0
M  V30 38 C 0.714471 3.300000 0.000000 0
M  V30 39 C 0.714471 4.125000 0.000000 0
M  V30 40 C 0.000000 4.537500 0.000000 0
M  V30 41 C -0.714471 4.125000 0.000000 0
M  V30 42 C -0.714471 3.300000 0.000000 0
M  V30 43 C -7.859181 -1.650000 0.000000 0
M  V30 44 C -7.144709 -2.887500 0.000000 0
M  V30 45 C 7.859181 -1.650000 0.000000 0
M  V30 46 C 7.144709 -2.887500 0.000000 0
M  V30 47 C -7.859181 -0.825000 0.000000 0
M  V30 48 C -8.573652 -0.412499 0.000000 0
M  V30 49 C -9.288122 -0.825000 0.000000 0
M  V30 50 C -9.288122 -1.650000 0.000000 0
M  V30 51 C -8.573652 -2.062500 0.000000 0
M  V30 52 C -7.859181 -3.300000 0.000000 0
M  V30 53 C -7.859181 -4.125000 0.000000 0
M  V30 54 C -7.144709 -4.537500 0.000000 0
M  V30 55 C -6.430238 -4.125000 0.000000 0
M  V30 56 C -6.430238 -3.300000 0.000000 0
M  V30 57 C 6.430238 -3.300000 0.000000 0
M  V30 58 C 6.430238 -4.125000 0.000000 0
M  V30 59 C 7.144709 -4.537500 0.000000 0
M  V30 60 C 7.859181 -4.125000 0.000000 0
M  V30 61 C 7.859181 -3.300000 0.000000 0
M  V30 62 C 8.573652 -2.062500 0.000000 0
M  V30 63 C 9.288122 -1.650000 0.000000 0
M  V30 64 C 9.288122 -0.825000 0.000000 0
M  V30 65 C 8.573652 -0.412500 0.000000 0
M  V30 66 C 7.859181 -0.825000 0.000000 0
M  V30 END ATOM
M  V30 BEGIN BOND
M  V30 1 2 1 2
M  V30 2 1 2 3
M  V30 3 2 3 4
M  V30 4 1 4 5
M  V30 5 2 5 6
M  V30 6 1 6 1
M  V30 7 1 2 7
M  V30 8 1 4 8
M  V30 9 2 8 9
M  V30 10 2 7 10
M  V30 11 1 10 11
M  V30 12 1 9 12
M  V30 13 2 11 13
M  V30 14 1 13 14
M  V30 15 2 14 15
M  V30 16 1 15 16
M  V30 17 2 16 17
M  V30 18 1 17 11
M  V30 19 2 12 18
M  V30 20 1 18 19
M  V30 21 2 19 20
M  V30 22 1 20 21
M  V30 23 2 21 22
M  V30 24 1 22 12
M  V30 25 1 15 23
M  V30 26 1 20 24
M  V30 27 2 23 25
M  V30 28 1 25 26
M  V30 29 2 26 27
M  V30 30 1 27 28
M  V30 31 2 28 29
M  V30 32 1 29 23
M  V30 33 2 24 30
M  V30 34 1 30 31
M  V30 35 2 31 32
M  V30 36 1 32 33
M  V30 37 2 33 34
M  V30 38 1 34 24
M  V30 39 1 27 35
M  V30 40 1 32 36
M  V30 41 1 6 37
M  V30 42 2 37 38
M  V30 43 1 38 39
M  V30 44 2 39 40
M  V30 45 1 40 41
M  V30 46 2 41 42
M  V30 47 1 42 37
M  V30 48 1 35 43
M  V30 49 1 35 44
M  V30 50 1 36 45
M  V30 51 1 36 46
M  V30 52 2 43 47
M  V30 53 1 47 48
M  V30 54 2 48 49
M  V30 55 1 49 50
M  V30 56 2 50 51
M  V30 57 1 51 43
M  V30 58 2 44 52
M  V30 59 1 52 53
M  V30 60 2 53 54
M  V30 61 1 54 55
M  V30 62 2 55 56
M  V30 63 1 56 44
M  V30 64 2 46 57
M  V30 65 1 57 58
M  V30 66 2 58 59
M  V30 67 1 59 60
M  V30 68 2 60 61
M  V30 69 1 61 46
M  V30 70 2 45 62
M  V30 71 1 62 63
M  V30 72 2 63 64
M  V30 73 1 64 65
M  V30 74 2 65 66
M  V30 75 1 66 45
M  V30 END BOND
M  V30 END CTAB
M  END
